# Supplementary material for: B Lymphocyte Development in the Bursa of Fabricius of Young Broilers is Influenced by the Gut Microbiota
Source: PubMed Central journal article supplement (PMC10100789; doi:10.1128/spectrum.04799-22), 2023-03-14
Supplement: spectrum.04799-22-s0001.pdf [file spectrum.04799-22-s0001.pdf]

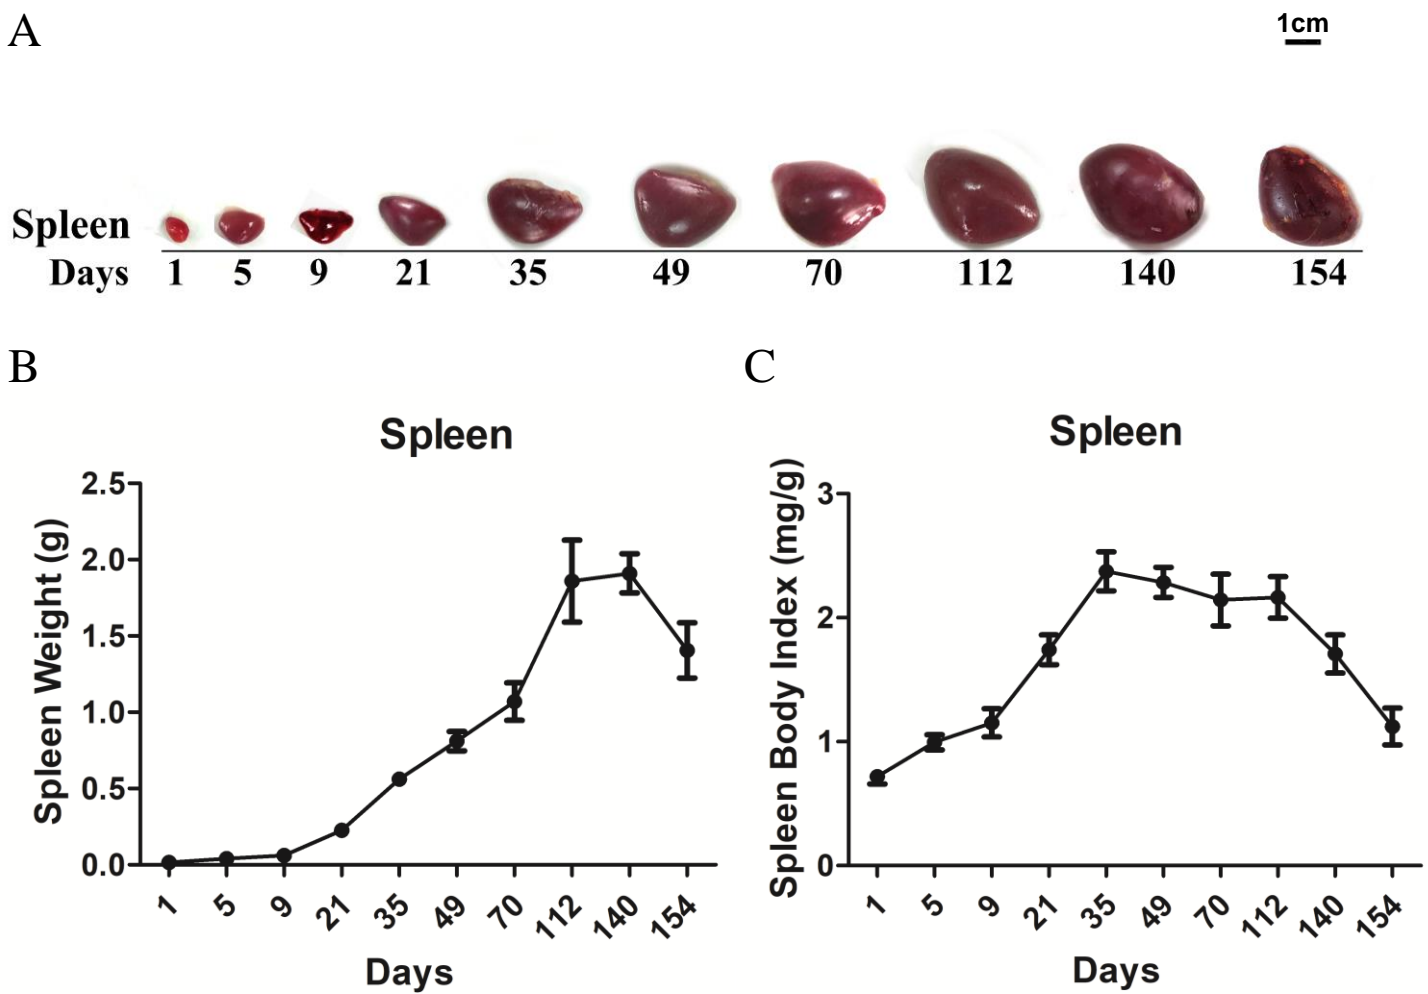

**Figure S1.** Size and weight of the spleen at different ages. (A) Size of spleen from 1 to 154 days. (B) Weight of spleen from 1 to 154 days. (C) Ratio of spleen to body weight from 1 to 154 days. Data are means  $\pm$  SEM ( $*P < 0.05$ ),  $n = 6$ .

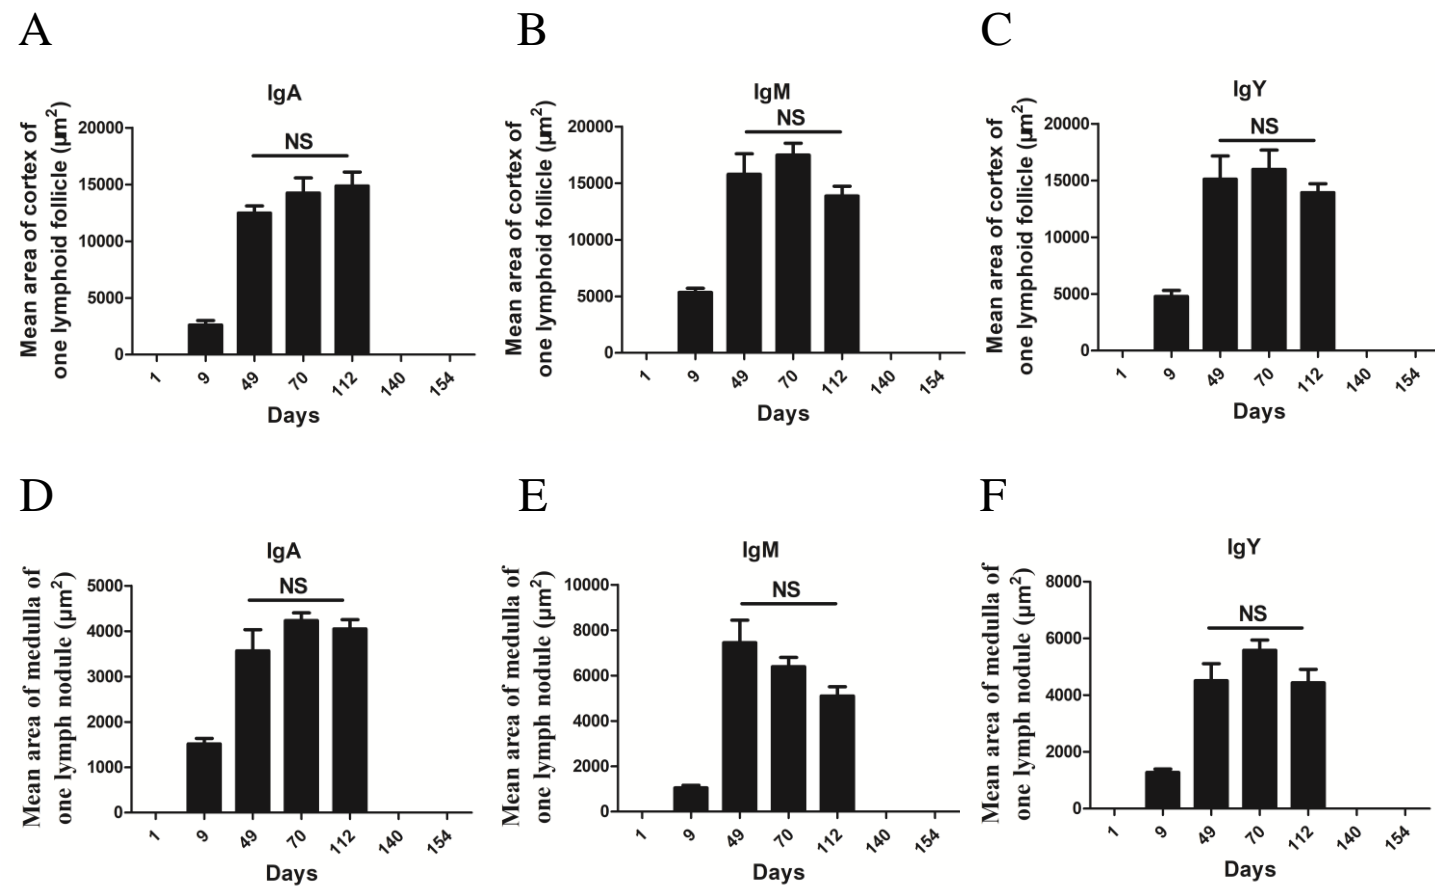

**Figure S2.** Age-related changes in immunostained sections of the spleen at different development stages. (A-C) IgA, IgM and IgY-positive medulla of lymph nodule on different days. (D-F) IgA, IgM and IgY-positive cortex of one lymphoid follicle on different days. Scale bar = 100  $\mu\text{m}$ . Ten random fields per specimen were analyzed with Image Pro-Plus Software V.6, and the mean intensity fluorescence per power field was recorded. Data are means  $\pm$  SEM ( $*P < 0.05$ ). Scale bars = 100  $\mu\text{m}$ ; n = 6.

# Bu-1 $\alpha$

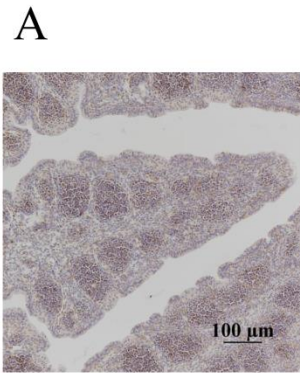

D1

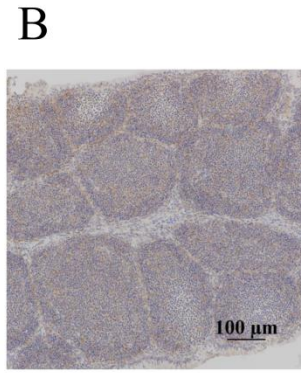

D9

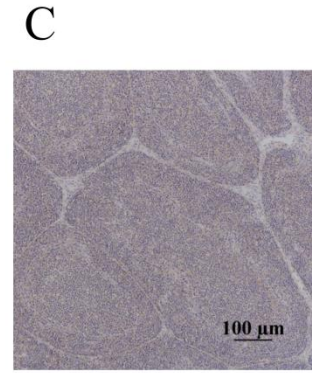

D49

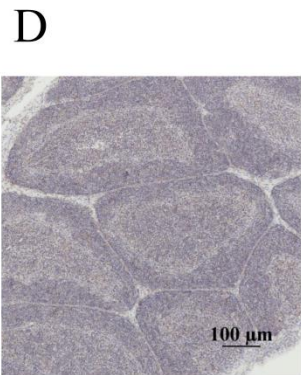

D70

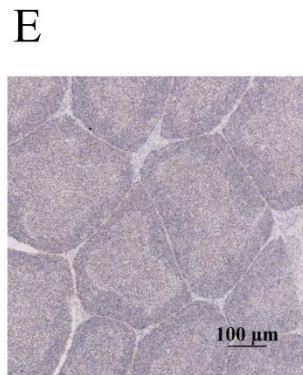

D112

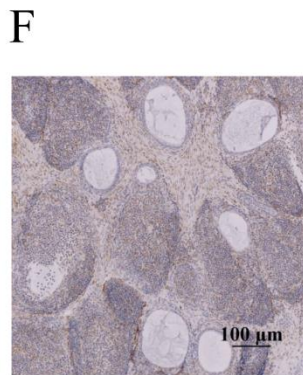

D140

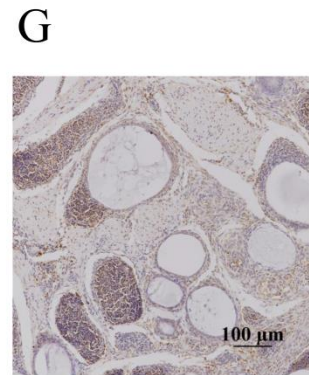

D154

**Figure S3.** Age-related changes in Bu-1 $\alpha$ -positive lymphoid follicle of the bursa of Fabricius at different development stages..

# IgA

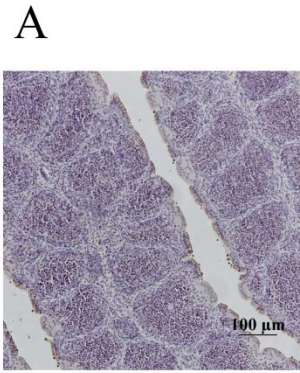

D1

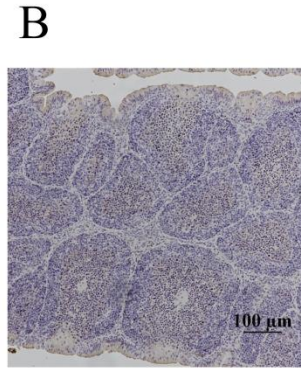

D9

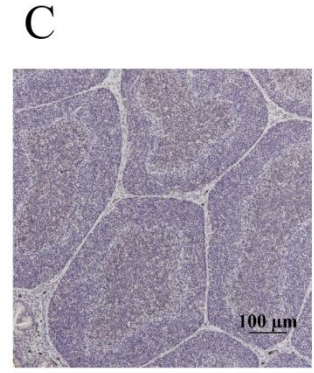

D49

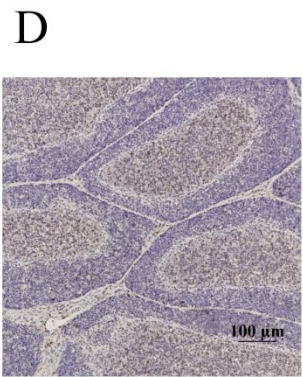

D70

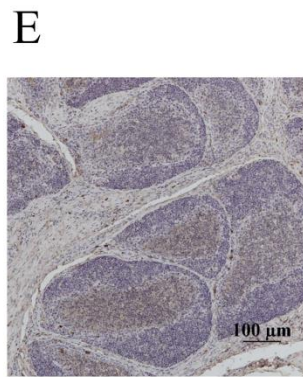

D112

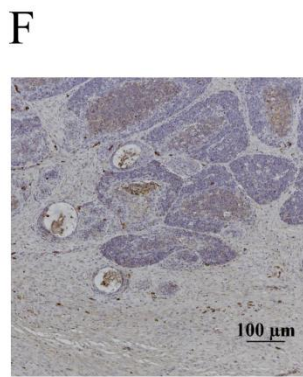

D140

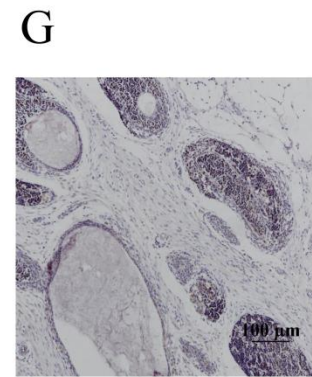

D154

**Figure S4.** Age-related changes in IgA-positive lymphoid follicle of the bursa of Fabricius at different development stages.



# IgM

A

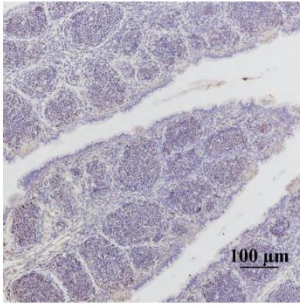

D1

B

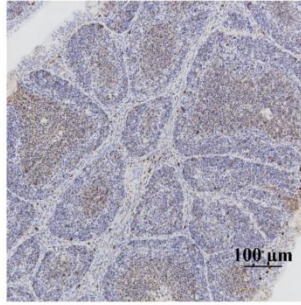

D9

C

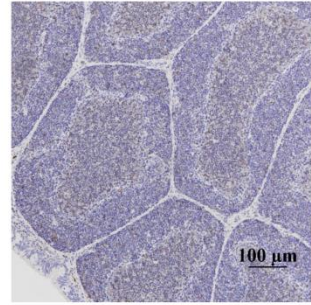

D49

D

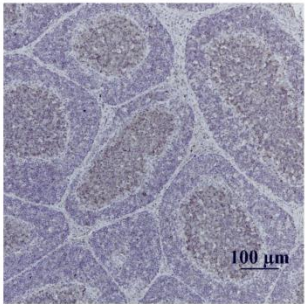

D70

E

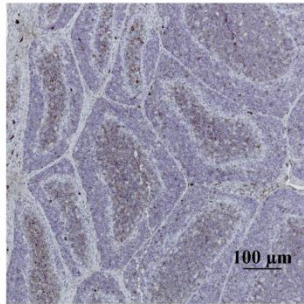

D112

F

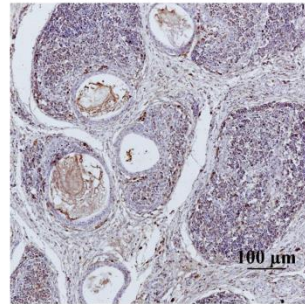

D140

G

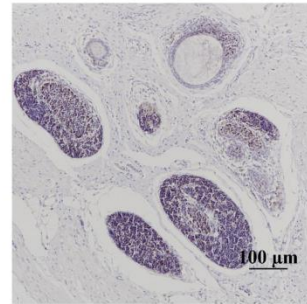

D154

**Figure S5.** Age-related changes in IgM-positive lymphoid follicle of the bursa of Fabricius at different development stages.

# IgY

A

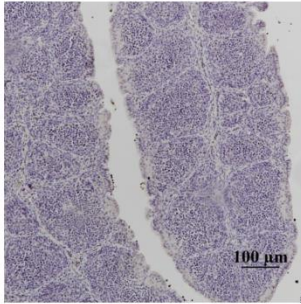

D1

B

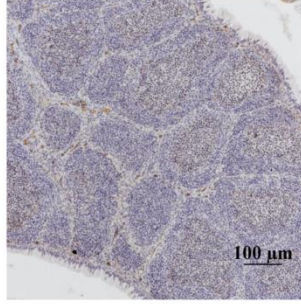

D9

C

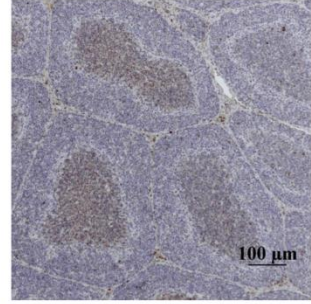

D49

D

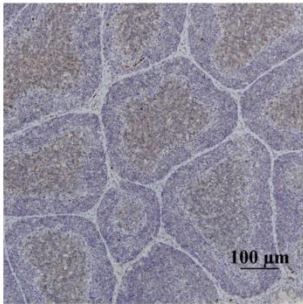

D70

E

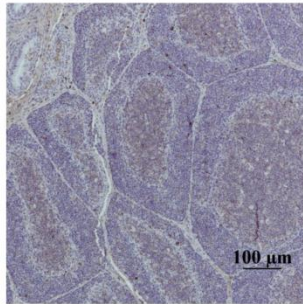

D112

F

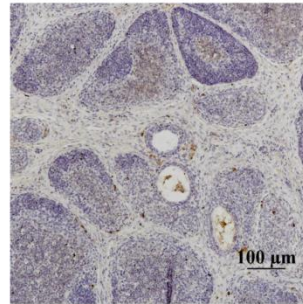

D140

G

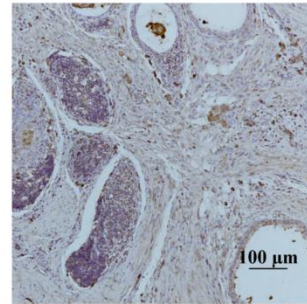

D154

**Figure S6.** Age-related changes in IgY-positive lymphoid follicle of the bursa of Fabricius at different development stages.

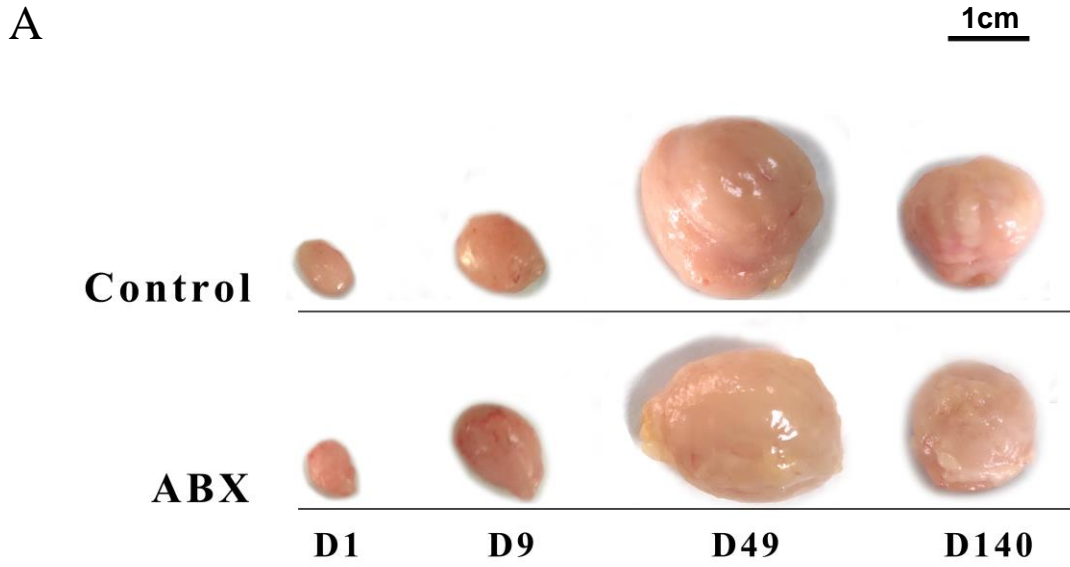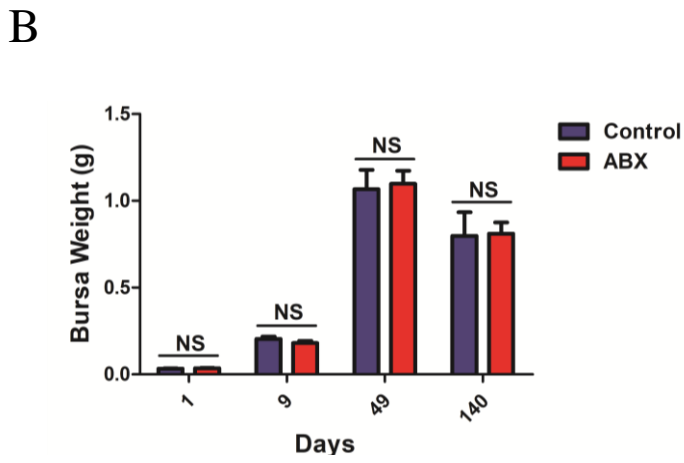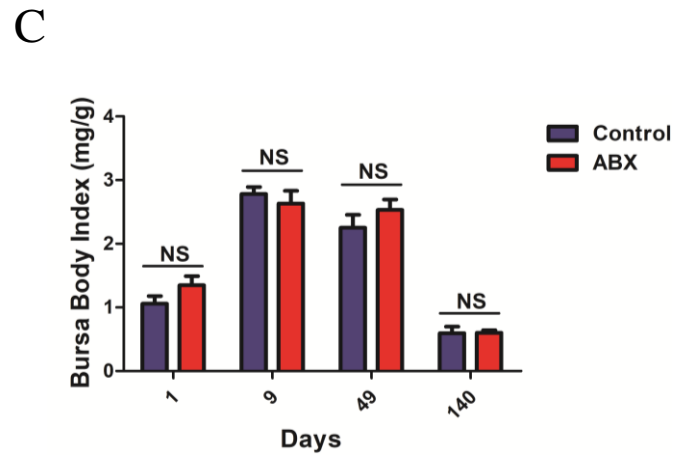

**Figure S7.** Changes of the size and weight of BF or the ratio of BF to body weight at different development stages under antibiotic treatment.



A

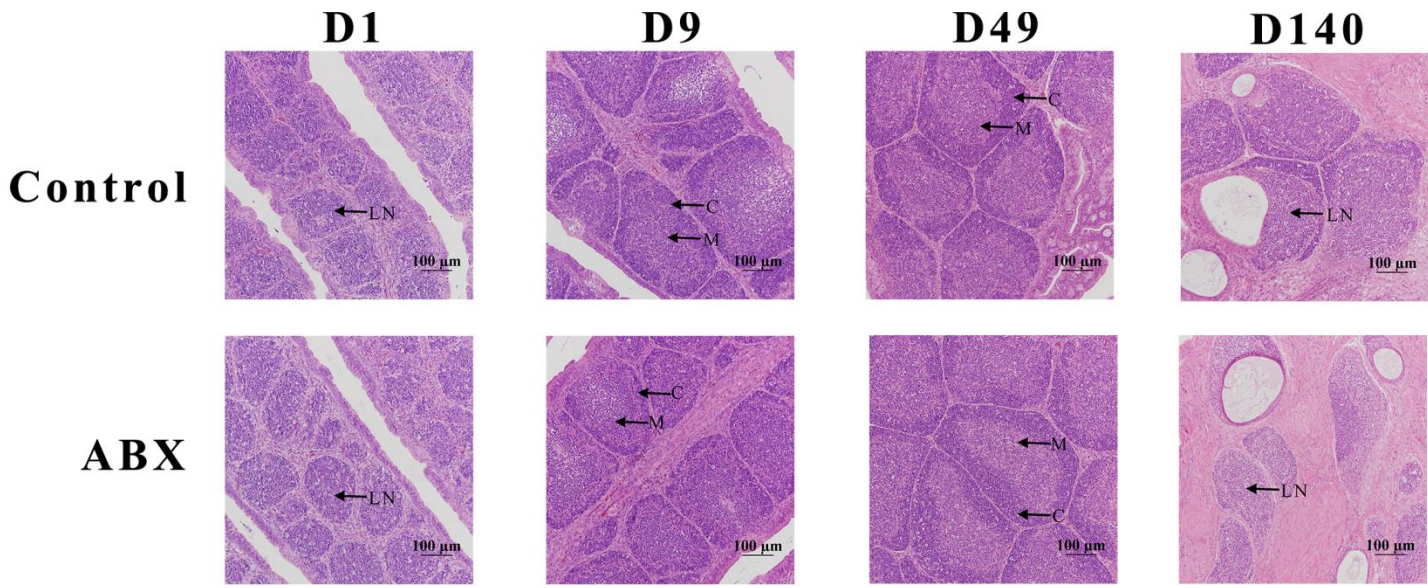

B

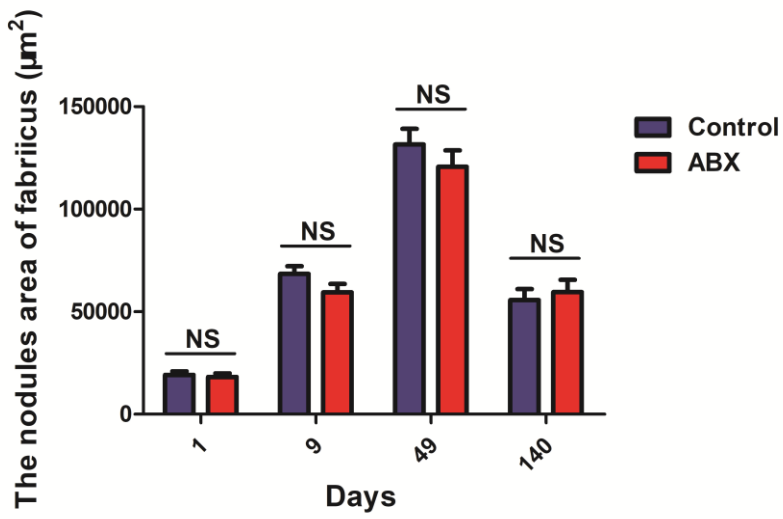

**Figure S8.** Changes of the nodule area of the bursa at different development stages under antibiotic treatment.



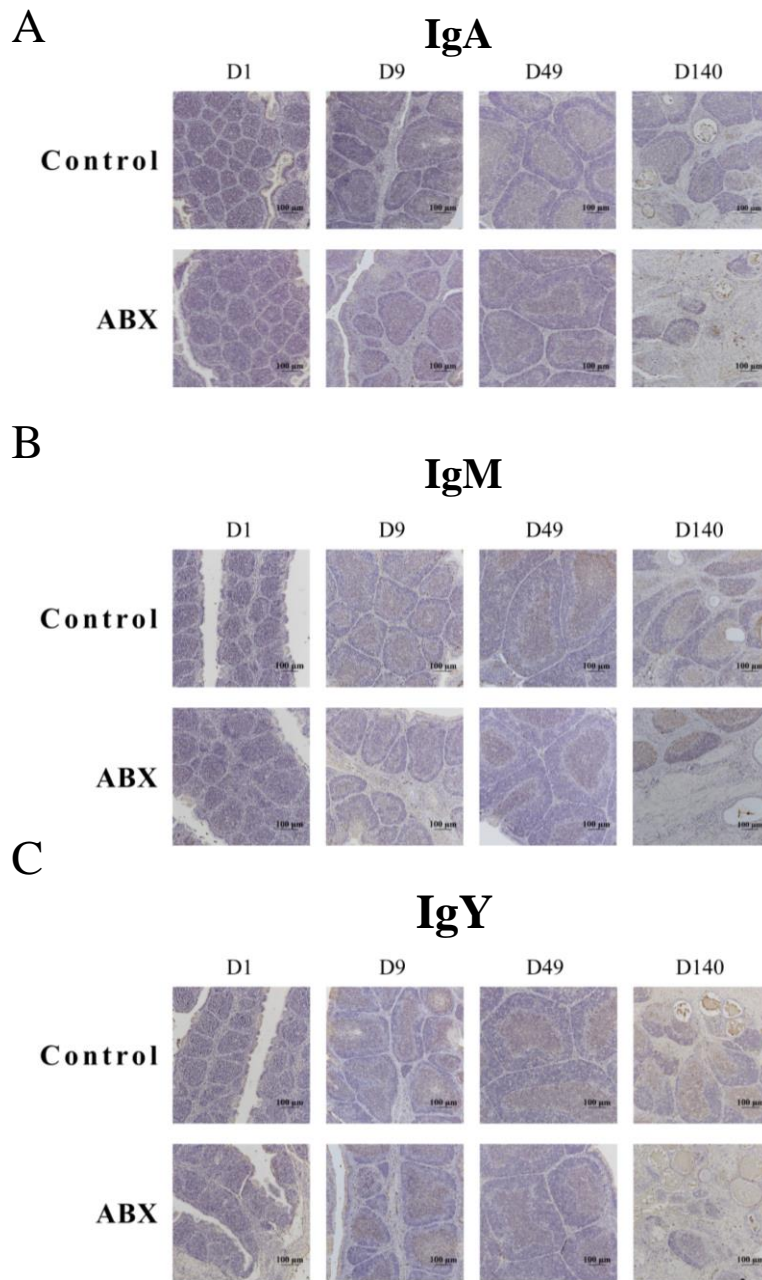

**Figure S9.** Changes of IgA, IgM and IgY in bursa cells after antibiotic treatment.

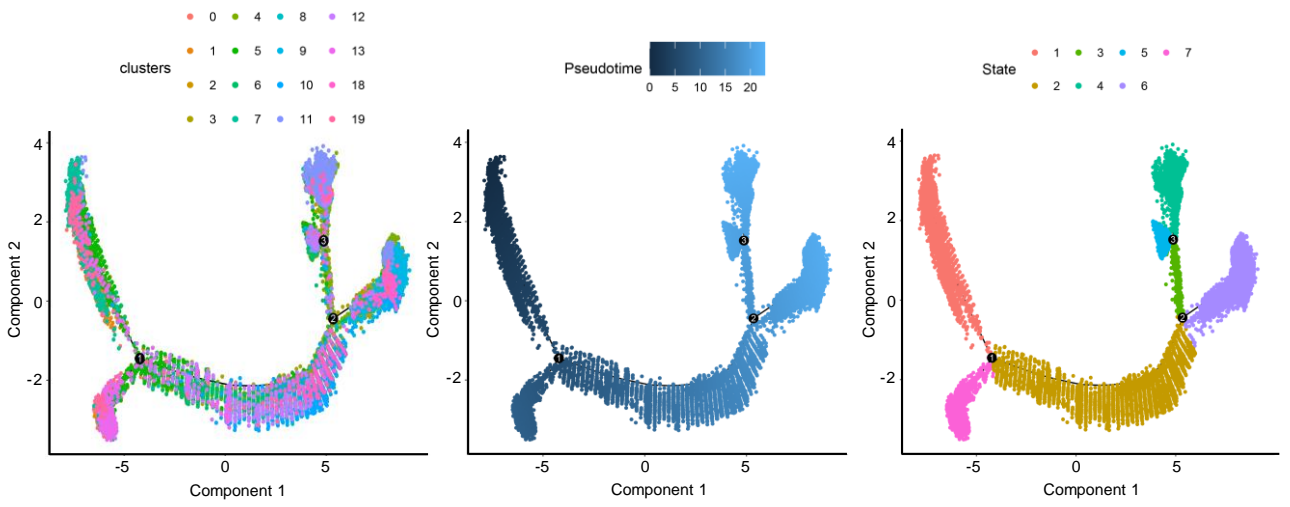

**Figure S10.** Changes of the developmental trajectory and differentiation gene expression pattern of large B cells, small B cells, and unnamed B cells under antibiotic treatment.

**Table S1** Histological measurement of fabricius at different ages

| Age in days | The cortical thickness of fabricius ( $\mu\text{m}$ ) | The medullary thickness of fabricius ( $\mu\text{m}$ ) |
|-------------|-------------------------------------------------------|--------------------------------------------------------|
| 1           | —                                                     | —                                                      |
| 9           | 41 $\pm$ 4 <sup>b</sup>                               | 143.82 $\pm$ 6.64 <sup>b</sup>                         |
| 49          | 71 $\pm$ 4 <sup>a</sup>                               | 291.45 $\pm$ 17.14 <sup>a</sup>                        |
| 70          | 80 $\pm$ 6 <sup>a</sup>                               | 294.4 $\pm$ 23.39 <sup>a</sup>                         |
| 112         | 66 $\pm$ 8 <sup>a</sup>                               | 353.78 $\pm$ 23.64 <sup>a</sup>                        |
| 140         | —                                                     | —                                                      |
| 154         | —                                                     | —                                                      |

Note: n=6. Data are means  $\pm$  SE. Data <sup>a-c</sup>Different superscripts letters represent different ages significant differences in the same column ( $P < 0.05$ ). “—” Represents an unmeasurable scale.
